# Supplementary material for: A Durum Wheat Variety-Based Product Is Effective in Reducing Symptoms in Patients with Non-Celiac Gluten Sensitivity: A Double-Blind Randomized Cross-Over Trial
Source: PubMed Central journal article supplement (PMC6521061; doi:10.3390/nu11040712), 2019-03-27
Supplement: nutrients-11-00712-s001.pdf [file nutrients-11-00712-s001.pdf]

**Supplementary Table 1.** scores for each item of the GRS questionnaire

|                                  | Commercial | Durum<br>Wheat | P value (Wilcoxon) |
|----------------------------------|------------|----------------|--------------------|
| <b>INTESTINAL SYMPTOMS</b>       |            |                |                    |
| Abdominal pain or discomfort     | 2.89       | 1.54           | 0.17               |
| Heartburn                        | 1.74       | 0.84           | 0.31               |
| Acid regurgitation               | 1.84       | 0.56           | 0.08               |
| Bloating                         | 4.37       | 2.26           | <b>0.04</b>        |
| Nausea and vomiting              | 1.77       | 0.56           | 0.06               |
| Borborygmus                      | 2.65       | 1.02           | 0.06               |
| Abdominal distension             | 2.75       | 1.27           | <b>0.004</b>       |
| Eructation                       | 2.23       | 0.88           | <b>0.01</b>        |
| Increased flatus                 | 2.85       | 1.78           | <b>0.02</b>        |
| Decreased passage of stools      | 1.67       | 1.18           | 0.1                |
| Increased passage of stools      | 2.53       | 1.00           | 0.05               |
| Loose stools                     | 3.57       | 2.01           | 0.07               |
| Hard stools                      | 2.04       | 1.21           | 0.1                |
| Urgent need for defecation       | 2.38       | 1.21           | 0.2                |
| Feeling of incomplete evacuation | 3.5        | 1.52           | <b>0.001</b>       |
| <b>EXTRA-INTESTINAL SYMPTOMS</b> |            |                |                    |
| Dermatitis                       | 1.94       | 0.81           | <b>0.01</b>        |
| Headache                         | 2.30       | 1.08           | 0.08               |
| Foggy mind                       | 1.79       | 0.53           | 0.12               |
| Numbness of the limbs            | 1.23       | 0.44           | <b>0.03</b>        |
